# Supplementary material
Source: Research Square preprint supplement (doi:10.21203/rs.3.rs-9408007/v1)
Supplement: Supplementary file 1 [file 1cff4d7a39ca80aa2b20f706.xlsx]

## Sheet: OTU Table (Genus Filtered)
Table S6. OTU differential abundance analysis - PXM-treated mice (filtered by genus).
Name	PXM vs. Control - Max group mean	PXM vs. Control - Log₂ fold change	PXM vs. Control - Fold change	PXM vs. Control - P value	PXM vs. Control - FDR P value	PXM vs. Control - Bonferroni P value	Immunized + PXM vs. Control - Max group mean	Immunized + PXM vs. Control - Log₂ fold change	Immunized + PXM vs. Control - Fold change	Immunized + PXM vs. Control - P value	Immunized + PXM vs. Control - FDR P value	Immunized + PXM vs. Control - Bonferroni P value	PXM vs. Immunized + PXM - Max group mean	PXM vs. Immunized + PXM - Log₂ fold change	PXM vs. Immunized + PXM - Fold change	PXM vs. Immunized + PXM - P value	PXM vs. Immunized + PXM - FDR P value	PXM vs. Immunized + PXM - Bonferroni P value
{Unknown}	0.0588235	1.34102	2.5333	0.763012	0.859188	1	0.0833333	1.13292	2.19302	0.797634	0.883182	1	0.0833333	0.208097	1.15516	0.856388	0.957333	1
{Unknown Phylum} Archaea	0	0.843793	1.79476	0.850147	0.859188	1	0.0416667	0.924723	1.89832	0.834349	0.883182	1	0.0416667	-0.0809306	-1.0577	0.947959	0.984938	1
{Unknown Phylum} Bacteria	0.235294	2.02215	4.06189	0.647417	0.859188	1	0	0.675514	1.59717	0.878691	0.883182	1	0.235294	1.34664	2.54318	0.219838	0.736751	1
Pyrinomonas	0	0.82472	1.77119	0.852779	0.859188	1	0	0.668277	1.58917	0.879576	0.883182	1	0	0.156444	1.11454	0.894953	0.957333	1
Bifidobacterium	1018.94	2.65986	6.31971	2.98111e-05	0.000163313	0.00375619	1298.08	2.25533	4.77444	9.95256e-05	0.000482317	0.0125402	1298.08	0.404527	1.32365	0.527721	0.957333	1
Corynebacterium	0	0.797573	1.73817	0.856736	0.859188	1	0.25	1.72543	3.30678	0.692559	0.883182	1	0.25	-0.927853	-1.90244	0.340543	0.877181	1
Rhodococcus	0	0.791502	1.73088	0.857631	0.859188	1	0.166667	1.50509	2.83843	0.730104	0.883182	1	0.166667	-0.71359	-1.63988	0.458813	0.907572	1
Enterorhabdus	234.118	1.58473	2.99951	8.25223e-07	4.72628e-06	0.000103978	285.458	1.44929	2.73074	1.23568e-06	8.64973e-06	0.000155695	285.458	0.135437	1.09843	0.635718	0.957333	1
Parvibacter	5.05882	0.589658	1.50489	0.515103	0.780353	1	3.875	-0.192339	-1.14261	0.826964	0.883182	1	5.05882	0.781998	1.71951	0.157739	0.621096	1
Uncultured-1	1.82353	4.38109	20.8372	0.315022	0.50244	1	1.29167	3.52428	11.5057	0.418563	0.659236	1	1.82353	0.85681	1.81103	0.119141	0.530676	1
Bacteroides	2408.47	5.61689	49.0741	3.53177e-14	8.90006e-13	4.45003e-12	1717.33	4.48779	22.4368	3.40112e-11	3.29647e-10	4.28542e-09	2408.47	1.1291	2.18722	0.12214	0.530676	1
{Unknown Genus} Muribaculaceae	6252.76	4.28885	19.5466	8.74687e-59	1.10211e-56	1.10211e-56	9555.12	4.47189	22.1909	1.50391e-75	1.89493e-73	1.89493e-73	9555.12	-0.183048	-1.13528	0.476032	0.907572	1
Muribaculum	455.235	4.73342	26.6012	7.16064e-12	1.1278e-10	9.02241e-10	484.417	4.44534	21.7862	4.2714e-12	4.89269e-11	5.38196e-10	484.417	0.288076	1.22101	0.640908	0.957333	1
Porphyromonas	0	0.787656	1.72627	0.858189	0.859188	1	0.0833333	1.13538	2.19676	0.794874	0.883182	1	0.0833333	-0.347719	-1.27255	0.722515	0.957333	1
{Unknown Genus} Prevotellaceae	0.647059	2.97305	7.85194	0.496237	0.771876	1	0.958333	3.15813	8.9267	0.468595	0.702893	1	0.958333	-0.185077	-1.13688	0.767601	0.957333	1
Prevotella_7	0.117647	1.49583	2.82026	0.732663	0.859188	1	0	0.647522	1.56648	0.882493	0.883182	1	0.117647	0.848305	1.80038	0.349791	0.877181	1
Prevotellaceae NK3B31 group	217.588	11.416	2732.45	0.0100993	0.0353474	1	0	0.690407	1.61374	0.877211	0.883182	1	217.588	10.7256	1693.24	3.50089e-20	2.20556e-18	4.41113e-18
Prevotellaceae UCG-001	1265.82	2.05592	4.15809	6.84919e-08	5.07646e-07	8.62998e-06	1112.62	1.56661	2.96208	6.65668e-06	3.99401e-05	0.000838742	1265.82	0.48931	1.40377	0.194215	0.710687	1
Alistipes	2518.71	3.95745	15.535	1.09861e-29	6.92123e-28	1.38425e-27	2467.5	3.7636	13.5817	1.16821e-31	7.3597e-30	1.47194e-29	2518.71	0.193851	1.14381	0.560767	0.957333	1
Candidatus Aquirestis	0	0.842281	1.79288	0.850467	0.859188	1	0	0.676528	1.59829	0.878639	0.883182	1	0	0.165753	1.12175	0.896272	0.957333	1
{Unknown Genus} Anaerolineaceae	0	0.841526	1.79194	0.850342	0.859188	1	0	0.676191	1.59792	0.878524	0.883182	1	0	0.165335	1.12143	0.894308	0.957333	1
Leptolinea	0	0.839775	1.78977	0.850709	0.859188	1	0	0.675404	1.59704	0.878704	0.883182	1	0	0.164371	1.12068	0.89541	0.957333	1
{Unknown Genus} A4b	0	0.833068	1.78147	0.851623	0.859188	1	0	0.67231	1.59362	0.879073	0.883182	1	0	0.160758	1.11787	0.895238	0.957333	1
{Unknown Family} FS117-23B-02	0	0.841712	1.79218	0.850414	0.859188	1	0	0.676274	1.59801	0.87858	0.883182	1	0	0.165438	1.12151	0.895163	0.957333	1
{Unknown Family} Chloroplast	0.117647	1.66817	3.17812	0.707421	0.859188	1	0.125	1.4039	2.64616	0.750707	0.883182	1	0.125	0.264272	1.20103	0.812648	0.957333	1
Truepera	0.0588235	1.33916	2.53003	0.76303	0.859188	1	0	0.676737	1.59852	0.878485	0.883182	1	0.0588235	0.662419	1.58273	0.573479	0.957333	1
Desulfovibrio	41.2941	8.38034	333.223	0.0592951	0.149424	1	8.20833	5.88316	59.0212	0.183743	0.345546	1	41.2941	2.49718	5.64582	0.0120151	0.116454	1
{Unknown Order} Bacilli	60.8235	9.27512	619.567	0.0367569	0.100682	1	47.6667	8.45907	351.912	0.0557969	0.146467	1	60.8235	0.816045	1.76057	0.404118	0.907572	1
Anaeroplasma	215	3.3997	10.5539	1.53639e-07	1.07547e-06	1.93585e-05	271.083	3.29936	9.84478	4.77555e-08	3.76075e-07	6.01719e-06	271.083	0.100342	1.07203	0.85874	0.957333	1
Bacillus	0	0.814019	1.7581	0.854171	0.859188	1	0.0416667	0.968871	1.95731	0.825291	0.883182	1	0.0416667	-0.154851	-1.11331	0.887001	0.957333	1
{Unknown Genus} Erysipelatoclostridiaceae	18.5882	8.84173	458.803	0.0465006	0.122064	1	36.9167	8.99559	510.436	0.0419581	0.114929	1	36.9167	-0.153854	-1.11254	0.874895	0.957333	1
Uncultured-2	11.7059	7.99218	254.616	0.0716294	0.170289	1	18.25	7.96118	249.203	0.0715938	0.176879	1	18.25	0.0310043	1.02172	0.974127	0.985038	1
{Unknown Genus} Erysipelotrichaceae	0.117647	1.5244	2.87667	0.728076	0.859188	1	0.25	1.78934	3.45656	0.681489	0.883182	1	0.25	-0.264936	-1.20158	0.741031	0.957333	1
Faecalibaculum	615.176	13.6394	12760.7	0.00203066	0.00825366	0.255863	797.208	13.3871	10713.2	0.00237469	0.00935034	0.299211	797.208	0.252317	1.19112	0.773672	0.957333	1
Turicibacter	2464.24	8.24145	302.638	5.61783e-21	2.35949e-19	7.07847e-19	1024.38	6.63777	99.5789	5.94304e-16	1.49765e-14	7.48823e-14	2464.24	1.60368	3.03918	0.0325718	0.228002	1
Uncultured-3	15.0588	7.52131	183.713	0.088301	0.195192	1	85.3333	9.68507	823.184	0.0276751	0.0781399	1	85.3333	-2.16376	-4.48082	0.00975189	0.102395	1
{Unknown Family} Lactobacillales	0	0.875856	1.8351	0.846082	0.859188	1	22.5833	7.82672	227.027	0.0765548	0.185498	1	22.5833	-6.95087	-123.714	3.64059e-08	1.14679e-06	4.58714e-06
Enterococcus	0	0.879846	1.84018	0.845612	0.859188	1	33.0417	8.35655	327.773	0.0589419	0.151565	1	33.0417	-7.47671	-178.12	5.97507e-09	2.50953e-07	7.52859e-07
{Unknown Genus} Lactobacillaceae	372	12.7093	6696.94	0.00410281	0.0147701	0.516954	738.375	12.6795	6560.29	0.0040535	0.0145926	0.510741	738.375	0.0297421	1.02083	0.974118	0.985038	1
HT002	0.117647	1.49582	2.82025	0.732664	0.859188	1	0	0.647522	1.56648	0.882493	0.883182	1	0.117647	0.848301	1.80038	0.349793	0.877181	1
Lactobacillus	588.412	-0.457961	-1.3736	0.687165	0.859188	1	1048.58	-0.759402	-1.69279	0.461904	0.701204	1	1048.58	0.301441	1.23238	0.794123	0.957333	1
Ligilactobacillus	2424	1.68948	3.2254	0.000960753	0.00417431	0.121055	2353.67	1.17336	2.25536	0.011609	0.0375059	1	2424	0.516121	1.4301	0.318374	0.877181	1
Limosilactobacillus	134.294	10.4966	1444.73	0.0174961	0.0551129	1	120.125	9.84586	920.234	0.0253457	0.0760372	1	134.294	0.650728	1.56996	0.450661	0.907572	1
Listeria	0	0.787656	1.72627	0.858457	0.859188	1	0	0.647522	1.56648	0.882678	0.883182	1	0	0.140134	1.10201	0.896156	0.957333	1
Streptococcus	4.82353	5.55364	46.9691	0.201225	0.362206	1	7.125	5.89603	59.55	0.174486	0.333109	1	7.125	-0.342391	-1.26786	0.327138	0.877181	1
{Unknown Family} RF39	25.3529	7.903	239.353	0.0698469	0.169857	1	24.75	7.61986	196.701	0.0801499	0.190545	1	25.3529	0.283135	1.21684	0.557962	0.957333	1
Staphylococcus	9.41176	6.2125	74.1562	0.157852	0.30599	1	2.95833	4.47344	22.2147	0.308138	0.517672	1	9.41176	1.73905	3.33816	0.026305	0.207152	1
{Unknown Order} Clostridia	213.824	10.9521	1981.18	0.011711	0.0398809	1	358.083	11.3318	2577.54	0.0090706	0.03061	1	358.083	-0.379635	-1.30101	0.243814	0.768015	1
Uncultured-4	13.0588	7.11348	138.475	0.101688	0.213546	1	18.3333	7.36176	164.479	0.0900903	0.205611	1	18.3333	-0.248276	-1.18779	0.476587	0.907572	1
{Unknown Family} Clostridia UCG-014	295.471	3.94812	15.4348	2.15565e-13	4.52686e-12	2.71612e-11	479.792	4.28745	19.5277	2.39283e-17	1.00499e-15	3.01497e-15	479.792	-0.339333	-1.26517	0.441597	0.907572	1
{Unknown Family} Clostridia vadinBB60 group	314.882	3.92416	15.1806	1.86083e-10	1.95387e-09	2.34465e-08	490.208	4.20167	18.4004	2.86452e-13	5.15614e-12	3.6093e-11	490.208	-0.277507	-1.2121	0.60003	0.957333	1
Clostridium sensu stricto 1	824.588	0.441449	1.35797	0.651016	0.859188	1	1694.88	0.665949	1.58661	0.452231	0.701204	1	1694.88	-0.2245	-1.16837	0.820681	0.957333	1
{Unknown Genus} Lachnospiraceae	793.294	12.7457	6868.16	0.00330596	0.0122515	0.41655	1365.83	13.2702	9879.63	0.00221802	0.0090152	0.279471	1365.83	-0.524533	-1.43847	0.0200762	0.180686	1
[Eubacterium] oxidoreducens group	0.384615	-5.75144	-53.8711	3.49689e-09	3.1472e-08	4.40608e-07	0.384615	-5.02868	-32.6426	1.42979e-12	1.86362e-11	1.80154e-10	0.166667	-0.722758	-1.65033	0.464465	0.907572	1
[Eubacterium] ventriosum group	113.471	-0.602183	-1.51801	0.552233	0.818604	1	171.917	0.151795	1.11095	0.869028	0.883182	1	171.917	-0.753977	-1.68644	0.460404	0.907572	1
[Eubacterium] xylanophilum group	287.118	-1.21359	-2.31913	0.0290618	0.0849633	1	592.667	-0.445045	-1.36136	0.37819	0.618856	1	592.667	-0.76854	-1.70355	0.171064	0.653152	1
[Ruminococcus] gnavus group	0.153846	-4.4249	-21.4797	4.1877e-05	0.000219854	0.0052765	0.153846	-4.56503	-23.6707	2.08529e-06	1.38287e-05	0.000262746	0	0.140134	1.10201	0.892686	0.957333	1
[Ruminococcus] torques group	6.41176	-1.36534	-2.57638	0.0919873	0.199582	1	4.04167	-2.14556	-4.42465	0.00440978	0.0154342	0.555632	6.41176	0.78022	1.71739	0.292796	0.877181	1
A2	289.118	-1.16782	-2.24672	0.0558292	0.143561	1	481	-0.59724	-1.51282	0.28159	0.486032	1	481	-0.570578	-1.48512	0.35505	0.877181	1
Acetatifactor	38.3529	-0.546941	-1.46098	0.189607	0.346239	1	46.2917	-0.486435	-1.40098	0.208748	0.370455	1	46.2917	-0.0605061	-1.04283	0.868956	0.957333	1
Acetitomaculum	3.88235	0.566545	1.48097	0.656241	0.859188	1	1.875	-0.452861	-1.36875	0.713425	0.883182	1	3.88235	1.01941	2.02708	0.222195	0.736751	1
Anaerostipes	8.17647	6.08391	67.8329	0.163027	0.308139	1	9.33333	6.20943	73.9987	0.153981	0.315999	1	9.33333	-0.125513	-1.0909	0.805362	0.957333	1
ASF356	149.941	3.01627	8.09071	9.27818e-09	7.30657e-08	1.16905e-06	105	2.09016	4.25796	2.61235e-05	0.000149617	0.00329157	149.941	0.926105	1.90014	0.0246799	0.207152	1
Blautia	226.647	-1.73479	-3.32832	0.00107461	0.00451335	0.135401	487.292	-0.664664	-1.5852	0.167616	0.329995	1	487.292	-1.07013	-2.09962	0.0456653	0.287692	1
Eisenbergiella	0	0.787656	1.72627	0.85868	0.859188	1	0.166667	1.49913	2.82673	0.731689	0.883182	1	0.166667	-0.711475	-1.63748	0.482598	0.907572	1
GCA-900066575	40.9412	-0.902456	-1.86925	0.00317363	0.0121175	0.399877	47.2083	-1.00341	-2.00473	0.000441101	0.00205847	0.0555787	47.2083	0.100952	1.07248	0.695159	0.957333	1
Lachnoclostridium	308.941	-2.18886	-4.55947	4.63714e-11	5.8428e-10	5.8428e-09	361.583	-2.1375	-4.39999	1.47906e-12	1.86362e-11	1.86362e-10	361.583	-0.0513655	-1.03625	0.878308	0.957333	1
Lachnospiraceae FCS020 group	11.7059	-1.3495	-2.54824	7.06677e-05	0.000356165	0.00890413	22.5417	-0.707873	-1.63339	0.0265873	0.077907	1	22.5417	-0.641627	-1.56009	0.00397333	0.0556266	0.500639
Lachnospiraceae NK4A136 group	2296.18	-1.838	-3.57514	2.63895e-10	2.55775e-09	3.32508e-08	3838.08	-1.23869	-2.35984	2.71526e-06	1.71061e-05	0.000342123	3838.08	-0.599308	-1.51499	0.0422162	0.27996	1
Lachnospiraceae UCG-001	230.941	-0.632496	-1.55025	0.174313	0.322992	1	336.458	-0.242343	-1.18291	0.5675	0.812557	1	336.458	-0.390154	-1.31053	0.400748	0.907572	1
Lachnospiraceae UCG-006	372.118	-0.399076	-1.31866	0.26959	0.441147	1	299.25	-0.857573	-1.81199	0.00923159	0.03061	1	372.118	0.458497	1.37411	0.203053	0.710687	1
Lachnospiraceae UCG-008	116.235	-0.892022	-1.85578	0.243723	0.420672	1	60.6667	-2.21796	-4.65235	0.0014492	0.00652139	0.182599	116.235	1.32594	2.50696	0.0853653	0.449891	1
Marvinbryantia	238.824	-2.05894	-4.1668	1.68427e-07	1.11694e-06	2.12219e-05	792.208	-0.369579	-1.29198	0.300858	0.512271	1	792.208	-1.68936	-3.22513	2.07549e-05	0.000435852	0.00261511
Roseburia	334.059	-1.45952	-2.75017	0.000103908	0.000503556	0.0130925	404.792	-1.37648	-2.59633	5.65333e-05	0.000309704	0.00712319	404.792	-0.0830442	-1.05925	0.826188	0.957333	1
Tuzzerella	21.0588	7.45861	175.9	0.0866654	0.194997	1	13.1667	6.75799	108.232	0.120291	0.261323	1	21.0588	0.700626	1.62521	0.101587	0.492307	1
Tyzzerella	16	1.62279	3.07969	0.128578	0.265588	1	37.625	2.93537	7.64955	0.00375453	0.0140001	0.473071	37.625	-1.31259	-2.48387	0.0970557	0.489161	1
Uncultured-5	2461.53	-1.46418	-2.75906	1.16235e-10	1.33142e-09	1.46456e-08	3533	-1.3024	-2.46639	2.74199e-10	2.46779e-09	3.4549e-08	3533	-0.161776	-1.11866	0.481988	0.907572	1
Monoglobus	10.3529	2.71836	6.58126	0.0144231	0.0478241	1	27.7083	3.46244	11.023	0.00150445	0.00653657	0.18956	27.7083	-0.74408	-1.67491	0.119376	0.530676	1
{Unknown Genus} [Eubacterium] coprostanoligenes group	245.118	0.303782	1.23438	0.520235	0.780353	1	253.542	-0.246642	-1.18644	0.567044	0.812557	1	253.542	0.550424	1.46452	0.240698	0.768015	1
Butyricicoccus	119.529	2.80271	6.97752	2.37634e-07	1.4258e-06	2.99419e-05	232.583	3.51899	11.4636	9.05359e-12	9.50627e-11	1.14075e-09	232.583	-0.716271	-1.64293	0.0734873	0.420882	1
UCG-009	9.23529	6.43819	86.7139	0.138187	0.278511	1	13.9167	6.66793	101.683	0.124464	0.263035	1	13.9167	-0.229743	-1.17263	0.4501	0.907572	1
Fastidiosipila	0	0.787656	1.72627	0.858189	0.859188	1	0	0.647522	1.56648	0.882493	0.883182	1	0	0.140134	1.10201	0.892686	0.957333	1
{Unknown Genus} Oscillospiraceae	93.2941	9.65488	806.135	0.0262306	0.0786917	1	105.042	9.54572	747.393	0.0279071	0.0781399	1	105.042	0.109154	1.0786	0.719514	0.957333	1
Colidextribacter	276.824	2.75333	6.74274	4.65747e-16	1.4671e-14	5.86841e-14	323.667	2.70968	6.54176	4.86932e-17	1.53384e-15	6.13535e-15	323.667	0.0436555	1.03072	0.860472	0.957333	1
Intestinimonas	25.0588	7.89682	238.33	0.0700996	0.169857	1	21.5	7.26547	153.86	0.0952701	0.210597	1	25.0588	0.631341	1.549	0.197509	0.710687	1
NK4A214 group	2.35294	4.91291	30.1255	0.259894	0.436622	1	4.95833	5.31693	39.8615	0.222007	0.388513	1	4.95833	-0.404014	-1.32318	0.427451	0.907572	1
Oscillibacter	260	1.60575	3.04353	8.31664e-09	6.98598e-08	1.0479e-06	292.917	1.46779	2.76597	2.11176e-08	1.77388e-07	2.66082e-06	292.917	0.137963	1.10035	0.546098	0.957333	1
UCG-003	9	0.265717	1.20223	0.75788	0.859188	1	13.3333	0.60195	1.51777	0.459134	0.701204	1	13.3333	-0.336232	-1.26246	0.612187	0.957333	1
UCG-005	2.82353	4.95502	31.0177	0.255646	0.435289	1	18.1667	7.34501	162.58	0.0913828	0.205611	1	18.1667	-2.38999	-5.24154	6.80627e-07	1.71518e-05	8.5759e-05
Uncultured-6	859.765	1.67802	3.19989	2.16768e-11	3.03475e-10	2.73128e-09	1060.75	1.67132	3.18506	4.67772e-13	7.36741e-12	5.89393e-11	1060.75	0.00670517	1.00466	0.977221	0.985038	1
{Unknown Genus} Ruminococcaceae	27.8235	1.15717	2.23019	0.08125	0.189583	1	93.125	2.50696	5.68421	6.14439e-05	0.000322581	0.00774193	93.125	-1.34979	-2.54876	0.00901656	0.102395	1
Anaerotruncus	99.4118	1.92155	3.7883	0.000250465	0.00116884	0.0315586	119.833	1.92305	3.79225	9.51553e-05	0.000479583	0.0119896	119.833	-0.00150266	-1.00104	0.997237	0.997237	1
Harryflintia	6.88235	6.04369	65.9677	0.163852	0.308139	1	8	5.90357	59.862	0.173653	0.333109	1	8	0.140119	1.102	0.629119	0.957333	1
Incertae Sedis	177.765	0.157685	1.1155	0.646727	0.859188	1	227.292	0.223195	1.16732	0.480733	0.712617	1	227.292	-0.0655104	-1.04646	0.839731	0.957333	1
Negativibacillus	0.647059	2.93006	7.62141	0.502332	0.771876	1	1.41667	3.5916	12.0554	0.409375	0.659236	1	1.41667	-0.661547	-1.58178	0.269598	0.82852	1
Paludicola	3.05882	5.11178	34.578	0.240188	0.420329	1	2.375	4.33806	20.2249	0.31857	0.528155	1	3.05882	0.773719	1.70967	0.0856935	0.449891	1
Ruminococcus	66.5294	9.18326	581.347	0.0351328	0.0983718	1	36.0417	8.15338	284.715	0.0611514	0.154102	1	66.5294	1.02988	2.04185	0.0301393	0.223386	1
UBA1819	3.94118	-0.899248	-1.86509	0.151317	0.297906	1	5.70833	-0.785407	-1.72358	0.190403	0.352806	1	5.70833	-0.113841	-1.08211	0.767241	0.957333	1
Uncultured-7	119.647	3.55434	11.748	3.84603e-12	6.92286e-11	4.846e-10	172.75	3.78619	13.7961	4.57745e-14	9.61264e-13	5.76758e-12	172.75	-0.231848	-1.17434	0.331779	0.877181	1
{Unknown Genus} UCG-010	14.8824	1.54847	2.92506	0.0410224	0.109975	1	28.3333	2.28835	4.88498	0.00188082	0.00789945	0.236983	28.3333	-0.739888	-1.67005	0.0648686	0.389211	1
Peptococcus	0.117647	1.49585	2.8203	0.733472	0.859188	1	0.0833333	1.13545	2.19687	0.795382	0.883182	1	0.117647	0.360399	1.28378	0.69116	0.957333	1
Uncultured-8	18.5882	3.1489	8.86982	0.00212663	0.00837359	0.267955	18.9167	2.95186	7.73745	0.00377781	0.0140001	0.476004	18.9167	0.197046	1.14635	0.436894	0.907572	1
[Eubacterium] brachy group	9.11765	6.41647	85.4182	0.139256	0.278511	1	8.54167	6.03553	65.5957	0.164156	0.328312	1	9.11765	0.380942	1.30219	0.151395	0.615346	1
[Eubacterium] nodatum group	55.5882	9.52772	738.124	0.0296697	0.0849633	1	39.2083	8.57447	381.216	0.049922	0.133834	1	55.5882	0.953253	1.93623	0.145926	0.612888	1
Family XIII AD3011 group	17.1176	7.52111	183.688	0.0846518	0.19393	1	5.45833	5.54338	46.6363	0.203363	0.369087	1	17.1176	1.97773	3.93872	0.000140067	0.0025212	0.0176484
Family XIII UCG-001	4.29412	5.37522	41.5051	0.216677	0.384525	1	13.5833	6.66229	101.286	0.125255	0.263035	1	13.5833	-1.28707	-2.44033	0.00142876	0.022503	0.180024
{Unknown Genus} Peptostreptococcaceae	93.7059	9.88016	942.374	0.0236586	0.0727068	1	178	10.2684	1233.41	0.0185367	0.0583905	1	178	-0.38828	-1.30883	0.476312	0.907572	1
Intestinibacter	0.0769231	-3.06602	-8.37459	0.0155946	0.0503827	1	0.208333	-2.59904	-6.05885	0.0222775	0.0684625	1	0.208333	-0.466975	-1.38221	0.607963	0.957333	1
Romboutsia	403.588	0.694919	1.61879	0.35863	0.564843	1	683.125	0.977509	1.96906	0.155492	0.315999	1	683.125	-0.28259	-1.21638	0.711014	0.957333	1
Uncultured-9	15.1765	7.31978	159.762	0.0934552	0.199582	1	23.0417	7.37256	165.715	0.0906979	0.205611	1	23.0417	-0.0527775	-1.03726	0.919816	0.965807	1
Fusobacterium	0.117647	1.49583	2.82026	0.732663	0.859188	1	0	0.647522	1.56648	0.882493	0.883182	1	0.117647	0.848305	1.80038	0.349791	0.877181	1
{Unknown Family} Candidatus Pacebacteria	0	0.839017	1.78883	0.850781	0.859188	1	0	0.675061	1.59666	0.878724	0.883182	1	0	0.163957	1.12036	0.895129	0.957333	1
{Unknown Family} Candidatus Woesebacteria	0	0.787656	1.72627	0.858227	0.859188	1	0	0.647522	1.56648	0.882519	0.883182	1	0	0.140134	1.10201	0.893194	0.957333	1
Candidatus Saccharimonas	68.5294	4.03453	16.3875	1.93144e-07	1.21681e-06	2.43362e-05	80	4.01705	16.1903	1.4914e-07	1.10539e-06	1.87917e-05	80	0.0174745	1.01219	0.95367	0.984938	1
Sphingomonas	0	0.826305	1.77314	0.852568	0.859188	1	0	0.669059	1.59004	0.879484	0.883182	1	0	0.157247	1.11516	0.895106	0.957333	1
{Unknown Order} Gammaproteobacteria	0	0.787656	1.72627	0.858189	0.859188	1	0	0.647522	1.56648	0.882493	0.883182	1	0	0.140134	1.10201	0.892686	0.957333	1
{Unknown Genus} Enterobacteriaceae	0	0.787656	1.72627	0.858241	0.859188	1	0.0416667	0.911978	1.88162	0.834843	0.883182	1	0.0416667	-0.124321	-1.08999	0.902184	0.957333	1
Enterobacter	0	0.787656	1.72627	0.858189	0.859188	1	0	0.647522	1.56648	0.882493	0.883182	1	0	0.140134	1.10201	0.892686	0.957333	1
Escherichia-Shigella	0	0.787656	1.72627	0.858189	0.859188	1	0.0833333	1.1354	2.1968	0.794869	0.883182	1	0.0833333	-0.347747	-1.27257	0.722493	0.957333	1
Salmonella	0	0.787656	1.72627	0.859188	0.859188	1	0	0.647522	1.56648	0.883182	0.883182	1	0	0.140134	1.10201	0.904148	0.957333	1
Acinetobacter	0	0.830574	1.77839	0.852028	0.859188	1	0	0.671126	1.59232	0.87926	0.883182	1	0	0.159447	1.11686	0.895736	0.957333	1
Pseudomonas	2.11765	4.86302	29.1015	0.267902	0.441147	1	0.833333	2.73703	6.66697	0.532733	0.780516	1	2.11765	2.12599	4.36503	0.00616576	0.0776886	0.776886
Stenotrophomonas	0	0.787656	1.72627	0.858189	0.859188	1	0.166667	1.49925	2.82695	0.730914	0.883182	1	0.166667	-0.71159	-1.63761	0.451264	0.907572	1
Akkermansia	4677.53	15.8459	58895.6	0.000311661	0.00140247	0.0392693	1.70833	3.59169	12.0561	0.413417	0.659236	1	4677.53	12.2542	4885.14	5.61043e-56	7.06914e-54	7.06914e-54
Amblyospora	0	0.830574	1.77839	0.851957	0.859188	1	0	0.671126	1.59232	0.879212	0.883182	1	0	0.159447	1.11686	0.895075	0.957333	1
N/A	1.94118	4.69742	25.9457	0.289084	0.466982	1	8.625	5.58997	48.1668	0.205049	0.369087	1	8.625	-0.892546	-1.85645	0.340573	0.877181	1
Article title: Immunization with a peptide fragment of resistin-like molecule beta results in attenuation of colitis associated with altered microflora in IL-10-/- mice
Journal name: Digestive Diseases and Sciences
Author names: Sean L. Barnes, Alda Vidrich, Manjit Maskey, Jing He, Kamil Khanipov, Steven M. Cohn
Corresponding author: Steven M. Cohn, Department of Internal Medicine, University of Texas Medical Branch, smcohn@utmb.edu
