# Supplementary material
Source: Research Square preprint supplement (doi:10.21203/rs.3.rs-9408007/v1)
Supplement: Supplementary file 1 [file 9fa38c949b3317b9fba63a1e.pdf]

**A**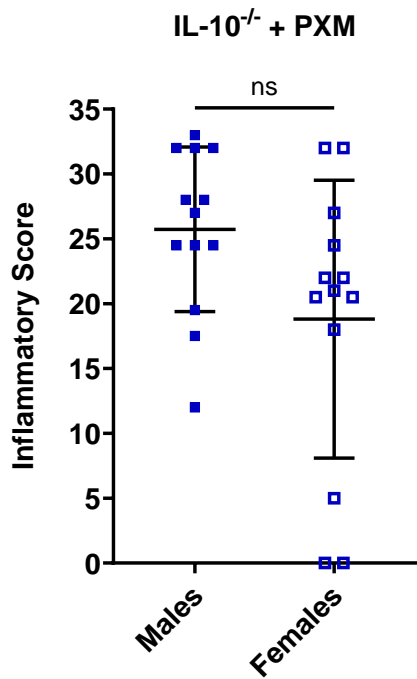**B**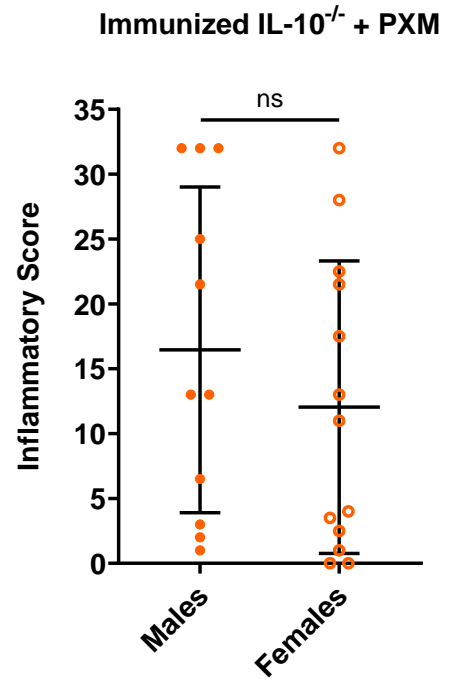

**Fig.S1** PXM-accelerated inflammatory response in male and female IL-10<sup>-/-</sup> mice. **A** Inflammatory scores in nonimmunized male and female IL-10<sup>-/-</sup> mice treated with PXM (200 ppm). Horizontal line and error bars represent the mean inflammatory score  $\pm$  SD of each respective gender group. ns = not significant using unpaired two-tailed Welch's t test. n = 13 per group. **B** Inflammatory scores in male and female IL-10<sup>-/-</sup> mice immunized with RELM $\beta$  peptide and treated with PXM. Horizontal line and error bars represent the mean inflammatory score  $\pm$  SD of each respective gender group. ns = not significant using unpaired two-tailed Welch's t test. n = 11-13 per group.

Article title: Immunization with a peptide fragment of resistin-like molecule beta results in attenuation of colitis associated with altered microflora in IL-10<sup>-/-</sup> mice

Journal name: Digestive Diseases and Sciences

Author names: Sean L. Barnes, Alda Vidrich, Manjit Maskey, Jing He, Kamil Khanipov, Steven M. Cohn

Corresponding author: Steven M. Cohn, Department of Internal Medicine, University of Texas Medical Branch, smcohn@utmb.edu
