# Supplementary material
Source: Research Square preprint supplement (doi:10.21203/rs.3.rs-9408007/v1)
Supplement: Supplementary file 2 [file 58141357c0d60b7286981ffa.xlsx]

## Sheet: OTU Table (Family Filtered)
Table S2. OTU differential abundance analysis - sham vs. immunized (filtered by family).
Name	Sham stool vs. Immunized stool - Max group mean	Sham stool vs. Immunized stool - Log₂ fold change	Sham stool vs. Immunized stool - Fold change	Sham stool vs. Immunized stool - P value	Sham stool vs. Immunized stool - FDR P value	Sham stool vs. Immunized stool - Bonferroni P value	Sham mucus vs. Immunized mucus - Max group mean	Sham mucus vs. Immunized mucus - Log₂ fold change	Sham mucus vs. Immunized mucus - Fold change	Sham mucus vs. Immunized mucus - P value	Sham mucus vs. Immunized mucus - FDR P value	Sham mucus vs. Immunized mucus - Bonferroni P value
Bifidobacteriaceae	2.30769	-2.19771	-4.58751	0.0189226	0.227071	0.454143	0.923077	-0.137876	-1.10028	0.881375	0.980085	1
Eggerthellaceae	9.30769	-0.543817	-1.45782	0.15887	0.534663	1	13.75	-0.220912	-1.16547	0.539616	0.980085	1
Bacteroidaceae	1.41667	-0.575031	-1.48971	0.426027	0.576615	1	1.25	0.111714	1.08051	0.886367	0.980085	1
Muribaculaceae	14.6154	-0.486993	-1.40152	0.245054	0.534663	1	13.75	-0.0909295	-1.06506	0.829353	0.980085	1
Prevotellaceae	8.5	-0.460388	-1.37591	0.342144	0.566804	1	6.41667	0.672263	1.59357	0.202978	0.953018	1
Rikenellaceae	4.46154	-0.57454	-1.4892	0.177083	0.534663	1	7.66667	0.411233	1.32982	0.303364	0.980085	1
Tannerellaceae	0.230769	-1.30136	-2.46461	0.31734	0.566804	1	0.230769	-1.18158	-2.26825	0.238254	0.953018	1
Desulfovibrionaceae	0	-0.0154682	-1.01078	0.994723	0.994723	1	0.461538	-0.919163	-1.89102	0.226126	0.953018	1
Acholeplasmataceae	1.41667	0.779017	1.71596	0.377869	0.566804	1	3.33333	0.437935	1.35466	0.578162	0.980085	1
Erysipelotrichaceae	0.166667	1.73749	3.33454	0.368687	0.566804	1	0	-0.477477	-1.39231	0.719579	0.980085	1
Lactobacillaceae	104	-1.30102	-2.46403	0.045822	0.366576	1	34.5385	-1.07475	-2.10635	0.102516	0.82013	1
Christensenellaceae	0.0833333	1.11226	2.16184	0.584298	0.701157	1	0.0833333	-0.498236	-1.41249	0.654806	0.980085	1
{Unknown Family} Clostridia UCG-014	1.25	-0.0857276	-1.06122	0.908045	0.990594	1	1.15385	-0.59266	-1.50803	0.411483	0.980085	1
{Unknown Family} Clostridia vadinBB60 group	1.38462	-0.881507	-1.8423	0.239069	0.534663	1	4.58333	0.0540193	1.03815	0.924674	0.980085	1
Clostridiaceae	7.66667	8.08875	272.243	0.000145101	0.00348243	0.00348243	4.25	4.91032	30.0713	0.00123845	0.0297228	0.0297228
Anaerofustaceae	0	-0.0154682	-1.01078	0.994723	0.994723	1	0.0833333	-0.498183	-1.41243	0.654839	0.980085	1
Lachnospiraceae	1101.5	0.35318	1.27737	0.220702	0.534663	1	3396.83	0.138628	1.10086	0.629886	0.980085	1
[Eubacterium] coprostanoligenes group	12.4167	0.0538195	1.03801	0.895713	0.990594	1	8.66667	0.0524145	1.037	0.902815	0.980085	1
Butyricicoccaceae	2.66667	0.528617	1.44255	0.364853	0.566804	1	12.8333	0.333976	1.26048	0.409023	0.980085	1
Oscillospiraceae	25	-0.240636	-1.18151	0.432461	0.576615	1	84.7692	-0.483559	-1.39819	0.0858803	0.82013	1
Ruminococcaceae	15.3333	0.516846	1.43082	0.196472	0.534663	1	41.75	0.0608958	1.04311	0.868197	0.980085	1
UCG-010	0.230769	-2.42913	-5.3857	0.162984	0.534663	1	0.0833333	0.0227917	1.01592	0.985231	0.985231	1
Anaerovoracaceae	0.0833333	1.11229	2.16189	0.584285	0.701157	1	0.25	0.688401	1.6115	0.544556	0.980085	1
Saccharimonadaceae	0.615385	-1.47623	-2.78221	0.0950831	0.534663	1	0.416667	-0.0626055	-1.04435	0.939248	0.980085	1
Article title: Immunization with a peptide fragment of resistin-like molecule beta results in attenuation of colitis associated with altered microflora in IL-10-/- mice
Journal name: Digestive Diseases and Sciences
Author names: Sean L. Barnes, Alda Vidrich, Manjit Maskey, Jing He, Kamil Khanipov, Steven M. Cohn
Corresponding author: Steven M. Cohn, Department of Internal Medicine, University of Texas Medical Branch, smcohn@utmb.edu
