# Supplementary material
Source: Research Square preprint supplement (doi:10.21203/rs.3.rs-9408007/v1)
Supplement: Supplementary file 3 [file 585a42a420dced94eaca0c49.xlsx]

## Sheet: OTU Table (Genus Filtered)
Table S3. OTU differential abundance analysis - sham vs. immunized (filtered by genus).
Name	Sham stool vs. Immunized stool - Max group mean	Sham stool vs. Immunized stool - Log₂ fold change	Sham stool vs. Immunized stool - Fold change	Sham stool vs. Immunized stool - P value	Sham stool vs. Immunized stool - FDR P value	Sham stool vs. Immunized stool - Bonferroni P value	Sham mucus vs. Immunized mucus - Max group mean	Sham mucus vs. Immunized mucus - Log₂ fold change	Sham mucus vs. Immunized mucus - Fold change	Sham mucus vs. Immunized mucus - P value	Sham mucus vs. Immunized mucus - FDR P value	Sham mucus vs. Immunized mucus - Bonferroni P value
Bifidobacterium	2.30769	-2.24363	-4.73589	0.00993944	0.0902893	0.596367	0.923077	-0.327762	-1.25506	0.697652	0.976415	1
Enterorhabdus	8.92308	-0.382191	-1.30332	0.259612	0.612467	1	13	-0.0525162	-1.03707	0.866414	0.976415	1
Parvibacter	0.384615	-1.10361	-2.14891	0.320388	0.612467	1	0.75	0.261242	1.19851	0.724059	0.976415	1
Bacteroides	1.41667	-0.321547	-1.24967	0.653644	0.839439	1	1.25	0.590764	1.50604	0.445112	0.976415	1
{Unknown Genus} Muribaculaceae	11.0833	-0.200652	-1.14922	0.619393	0.839439	1	10.3333	-0.0128478	-1.00895	0.974726	0.976415	1
Muribaculum	3.61538	-0.699953	-1.62445	0.229633	0.612467	1	3.41667	0.382679	1.30376	0.51481	0.976415	1
Prevotellaceae UCG-001	8.5	-0.18279	-1.13508	0.703461	0.879326	1	6.41667	0.874214	1.83301	0.0915415	0.409145	1
Alistipes	4.46154	-0.368562	-1.29107	0.357987	0.631741	1	7.66667	0.665431	1.58604	0.0751903	0.409145	1
Parabacteroides	0.230769	-1.12941	-2.18769	0.385486	0.642483	1	0.230769	-0.810706	-1.75407	0.418366	0.976415	1
Desulfovibrio	0	0.156453	1.11454	0.946669	0.974257	1	0.461538	-0.547977	-1.46203	0.470436	0.976415	1
Anaeroplasma	1.41667	0.839028	1.78884	0.305044	0.612467	1	3.33333	0.249383	1.1887	0.72453	0.976415	1
Uncultured-1	0.166667	1.9094	3.75653	0.323207	0.612467	1	0	-0.106463	-1.07659	0.936193	0.976415	1
Lactobacillus	83.7692	-1.29254	-2.44958	0.263675	0.612467	1	25.9231	-1.13589	-2.19754	0.328261	0.898981	1
Ligilactobacillus	20.2308	-0.862656	-1.81838	0.129594	0.494995	1	10.3333	-0.0204693	-1.01429	0.971831	0.976415	1
Uncultured-2	0.0833333	1.28417	2.43543	0.527591	0.772084	1	0.0833333	-0.127183	-1.09216	0.909127	0.976415	1
{Unknown Family} Clostridia UCG-014	1.25	0.12753	1.09242	0.862184	0.974257	1	1.15385	-0.233402	-1.1756	0.74224	0.976415	1
{Unknown Family} Clostridia vadinBB60 group	1.38462	-0.771957	-1.70758	0.218535	0.612467	1	4.58333	-0.0677526	-1.04808	0.87004	0.976415	1
Clostridium sensu stricto 1	7.66667	7.48645	179.327	0.000326568	0.00979704	0.0195941	4.25	4.61478	24.5011	0.00178215	0.0178215	0.106929
Anaerofustis	0	0.156453	1.11454	0.946669	0.974257	1	0.0833333	-0.127138	-1.09212	0.90916	0.976415	1
[Eubacterium] oxidoreducens group	0.166667	-0.0468528	-1.03301	0.970053	0.974257	1	1	0.177386	1.13083	0.771228	0.976415	1
[Eubacterium] xylanophilum group	29.9231	-0.342614	-1.26805	0.582808	0.813221	1	74.8462	-0.990105	-1.98633	0.10762	0.43048	1
[Ruminococcus] gnavus group	0.0833333	1.28417	2.43543	0.527591	0.772084	1	0.166667	-0.138341	-1.10064	0.887528	0.976415	1
[Ruminococcus] torques group	1.08333	1.15463	2.22628	0.108386	0.464513	1	2.33333	1.13003	2.18863	0.0207376	0.138251	1
A2	54.8462	-1.25722	-2.39036	0.0343976	0.23175	1	269.923	-2.28076	-4.85933	9.66292e-05	0.00144944	0.00579775
Acetatifactor	1.58333	0.149896	1.10949	0.80651	0.974257	1	5.25	0.203827	1.15175	0.650484	0.976415	1
Acetitomaculum	0.833333	1.42658	2.68809	0.101027	0.464513	1	2.08333	0.0586829	1.04151	0.885593	0.976415	1
Anaerostipes	0	0.156453	1.11454	0.946669	0.974257	1	0.153846	-1.00925	-2.01287	0.38463	0.976415	1
ASF356	1.58333	1.5603	2.94916	0.0581253	0.290627	1	8.58333	0.536799	1.45075	0.266251	0.822698	1
Blautia	14.4615	-1.68514	-3.21571	0.00885545	0.0902893	0.531327	72.9231	-2.78697	-6.90181	4.79903e-06	9.59806e-05	0.000287942
GCA-900066575	3.07692	-0.420659	-1.33854	0.33121	0.612467	1	10.3077	-0.531708	-1.44564	0.0954673	0.409145	1
Lachnoclostridium	81.25	-0.27649	-1.21124	0.280462	0.612467	1	306.308	-0.842561	-1.79323	0.000678373	0.00814048	0.0407024
Lachnospiraceae FCS020 group	1.83333	0.417656	1.33576	0.398342	0.64596	1	6.58333	0.0897989	1.06422	0.742671	0.976415	1
Lachnospiraceae NK4A136 group	399.667	0.319573	1.24796	0.0401091	0.237726	1	1128.67	0.00450874	1.00313	0.976415	0.976415	1
Lachnospiraceae UCG-001	27.9167	1.04295	2.06043	0.0347625	0.23175	1	104.833	-0.120604	-1.08719	0.796942	0.976415	1
Lachnospiraceae UCG-006	42.0833	1.10935	2.15748	0.0105338	0.0902893	0.632025	119.083	0.226499	1.16999	0.586107	0.976415	1
Lachnospiraceae UCG-008	107.75	5.50846	45.5211	7.6715e-07	4.6029e-05	4.6029e-05	534.333	5.62323	49.2901	1.66458e-07	9.98748e-06	9.98748e-06
Marvinbryantia	22.75	0.460224	1.37575	0.302117	0.612467	1	19	0.103281	1.07421	0.816879	0.976415	1
Roseburia	73	-1.03558	-2.04994	0.000657375	0.0131475	0.0394425	302.077	-1.47079	-2.77174	4.41561e-07	1.32468e-05	2.64936e-05
Tuzzerella	0.153846	-1.80154	-3.48592	0.316968	0.612467	1	0.0833333	-0.127119	-1.09211	0.909173	0.976415	1
Tyzzerella	0.166667	0.620978	1.53792	0.65756	0.839439	1	0.307692	-0.394636	-1.31461	0.640938	0.976415	1
Uncultured-3	329.167	0.401799	1.32115	0.00801425	0.0902893	0.480855	982.083	-0.0519452	-1.03666	0.723938	0.976415	1
{Unknown Genus} [Eubacterium] coprostanoligenes group	12.4167	0.202877	1.15099	0.645536	0.839439	1	8.66667	0.443556	1.35995	0.329627	0.898981	1
Butyricicoccus	2.58333	0.979078	1.9712	0.0435832	0.237726	1	11.8333	0.123706	1.08953	0.59933	0.976415	1
UCG-009	0.230769	-1.12937	-2.18763	0.38549	0.642483	1	1	-0.0600335	-1.04249	0.913007	0.976415	1
Colidextribacter	2.66667	0.0137662	1.00959	0.974257	0.974257	1	9.16667	0.0452926	1.03189	0.874778	0.976415	1
Intestinimonas	0.0769231	-1.13197	-2.19158	0.556068	0.794383	1	0.230769	-0.439915	-1.35652	0.636298	0.976415	1
Oscillibacter	5.16667	0.615673	1.53227	0.133182	0.494995	1	17.8333	0.333814	1.26034	0.274233	0.822698	1
UCG-003	0	0.156453	1.11454	0.946669	0.974257	1	0.307692	-0.39469	-1.31466	0.640886	0.976415	1
UCG-005	0	0.156453	1.11454	0.946669	0.974257	1	0.166667	0.764432	1.6987	0.514869	0.976415	1
Uncultured-4	17.4615	-0.283915	-1.21749	0.326364	0.612467	1	66.1538	-0.76565	-1.70014	0.00285301	0.0244544	0.171181
{Unknown Genus} Ruminococcaceae	1.66667	0.139064	1.10119	0.830832	0.974257	1	5	-0.595425	-1.51092	0.244399	0.816915	1
Anaerotruncus	2.08333	0.63307	1.55086	0.315108	0.612467	1	10.5833	0.532704	1.44664	0.245075	0.816915	1
Incertae Sedis	7.66667	0.251737	1.19064	0.432509	0.682909	1	21.6923	-0.67825	-1.6002	0.00653155	0.0489866	0.391893
Ruminococcus	1	1.41475	2.66613	0.208816	0.612467	1	2	1.73079	3.31909	0.0908314	0.409145	1
UBA1819	0.666667	0.824674	1.77113	0.336857	0.612467	1	2.41667	0.782234	1.71979	0.117556	0.440834	1
Uncultured-5	2.25	0.0313767	1.02199	0.946956	0.974257	1	7.15385	-0.601417	-1.51721	0.0688663	0.409145	1
{Unknown Genus} UCG-010	0.230769	-2.25722	-4.78068	0.194843	0.612467	1	0.0833333	0.393706	1.31376	0.749141	0.976415	1
[Eubacterium] brachy group	0.0833333	1.28422	2.4355	0.527575	0.772084	1	0.0833333	0.393706	1.31376	0.749141	0.976415	1
Family XIII UCG-001	0	0.156453	1.11454	0.946669	0.974257	1	0.166667	0.764415	1.69868	0.51488	0.976415	1
Candidatus Saccharimonas	0.615385	-1.30435	-2.46972	0.140248	0.494995	1	0.416667	0.308242	1.2382	0.707435	0.976415	1
Article title: Immunization with a peptide fragment of resistin-like molecule beta results in attenuation of colitis associated with altered microflora in IL-10-/- mice
Journal name: Digestive Diseases and Sciences
Author names: Sean L. Barnes, Alda Vidrich, Manjit Maskey, Jing He, Kamil Khanipov, Steven M. Cohn
Corresponding author: Steven M. Cohn, Department of Internal Medicine, University of Texas Medical Branch, smcohn@utmb.edu
