# Supplementary material
Source: Research Square preprint supplement (doi:10.21203/rs.3.rs-9408007/v1)
Supplement: Supplementary file 4 [file 5e693f75b91c5e06f112ce67.xlsx]

## Sheet: OTU Table (Phyla Filtered)
Table S1. OTU differential abundance analysis - sham vs. immunized (filtered by phyla).
Name	Sham stool vs. Immunized stool - Max group mean	Sham stool vs. Immunized stool - Log₂ fold change	Sham stool vs. Immunized stool - Fold change	Sham stool vs. Immunized stool - P value	Sham stool vs. Immunized stool - FDR P value	Sham stool vs. Immunized stool - Bonferroni P value	Sham mucus vs. Immunized mucus - Max group mean	Sham mucus vs. Immunized mucus - Log₂ fold change	Sham mucus vs. Immunized mucus - Fold change	Sham mucus vs. Immunized mucus - P value	Sham mucus vs. Immunized mucus - FDR P value	Sham mucus vs. Immunized mucus - Bonferroni P value
Actinobacteriota	11.6154	-0.90296	-1.8699	0.00526987	0.0263493	0.0263493	14.5833	0.0721061	1.05125	0.811956	0.998488	1
Bacteroidota	28.4615	-0.565975	-1.48039	0.133487	0.222478	0.667435	29.1667	0.506573	1.42067	0.181616	0.908082	0.908082
Desulfobacterota	0	-0.0197784	-1.0138	0.993253	0.993253	1	0.461538	-0.437514	-1.35427	0.564432	0.998488	1
Firmicutes	1230.08	0.00107993	1.00075	0.977196	0.993253	1	3577.25	-6.41282e-05	-1.00004	0.998488	0.998488	1
Patescibacteria	0.615385	-1.48069	-2.79083	0.0940902	0.222478	0.470451	0.416667	0.418726	1.33675	0.610174	0.998488	1
Article title: Immunization with a peptide fragment of resistin-like molecule beta results in attenuation of colitis associated with altered microflora in IL-10-/- mice
Journal name: Digestive Diseases and Sciences
Author names: Sean L. Barnes, Alda Vidrich, Manjit Maskey, Jing He, Kamil Khanipov, Steven M. Cohn
Corresponding author: Steven M. Cohn, Department of Internal Medicine, University of Texas Medical Branch, smcohn@utmb.edu
