# Supplementary material
Source: Research Square preprint supplement (doi:10.21203/rs.3.rs-9408007/v1)
Supplement: Supplementary file 5 [file 6936c988f4fc7cb472dc3d16.xlsx]

## Sheet: OTU Table (Phyla Filtered)
Table S4. OTU differential abundance analysis - PXM-treated mice (filtered by phyla).
Name	PXM vs. Control - Max group mean	PXM vs. Control - Log₂ fold change	PXM vs. Control - Fold change	PXM vs. Control - P value	PXM vs. Control - FDR P value	PXM vs. Control - Bonferroni P value	Immunized + PXM vs. Control - Max group mean	Immunized + PXM vs. Control - Log₂ fold change	Immunized + PXM vs. Control - Fold change	Immunized + PXM vs. Control - P value	Immunized + PXM vs. Control - FDR P value	Immunized + PXM vs. Control - Bonferroni P value	PXM vs. Immunized + PXM - Max group mean	PXM vs. Immunized + PXM - Log₂ fold change	PXM vs. Immunized + PXM - Fold change	PXM vs. Immunized + PXM - P value	PXM vs. Immunized + PXM - FDR P value	PXM vs. Immunized + PXM - Bonferroni P value
{Unknown}	0.0588235	1.05919	2.08377	0.811207	0.899695	1	0.0833333	0.949337	1.93098	0.8294	0.914556	1	0.0833333	0.109857	1.07912	0.919886	0.93629	1
{Unknown Phylum} Archaea	0	0.611482	1.52783	0.890793	0.899695	1	0.0416667	0.737109	1.66683	0.867294	0.914556	1	0.0416667	-0.125627	-1.09098	0.915852	0.93629	1
{Unknown Phylum} Bacteria	0.235294	1.78767	3.45258	0.684987	0.899695	1	0	0.483408	1.39804	0.912793	0.914556	1	0.235294	1.30427	2.46958	0.206429	0.837278	1
Acidobacteriota	0	0.577935	1.49271	0.896043	0.899695	1	0	0.475883	1.39077	0.913741	0.914556	1	0	0.102053	1.0733	0.926117	0.93629	1
Actinobacteriota	1259.94	1.45591	2.7433	0.000438757	0.00186472	0.00745887	1589.12	1.42278	2.68102	0.000160949	0.000912045	0.00273614	1589.12	0.0331285	1.02323	0.93629	0.93629	1
Bacteroidota	13119.4	3.75576	13.5081	6.71306e-31	1.14122e-29	1.14122e-29	15338	3.62081	12.3019	1.73754e-34	2.95382e-33	2.95382e-33	15338	0.134946	1.09805	0.679236	0.93629	1
Chloroflexi	0	0.609664	1.5259	0.89106	0.899695	1	0	0.484345	1.39895	0.912682	0.914556	1	0	0.125319	1.09075	0.917402	0.93629	1
Cyanobacteria	0.117647	1.41191	2.6609	0.749674	0.899695	1	0.125	1.23714	2.35731	0.778669	0.914556	1	0.125	0.174775	1.12879	0.86504	0.93629	1
Deinococcota	0.0588235	1.05547	2.0784	0.811766	0.899695	1	0	0.48429	1.3989	0.912693	0.914556	1	0.0588235	0.571183	1.48574	0.61485	0.93629	1
Desulfobacterota	41.2941	8.43353	345.736	0.0581167	0.197597	0.987984	8.20833	5.62969	49.5113	0.204036	0.7157	1	41.2941	2.80384	6.98297	0.00582317	0.049497	0.098994
Firmicutes	20037.2	-0.259429	-1.19701	0.166703	0.472325	1	26718.9	-0.133876	-1.09724	0.431817	0.914556	1	26718.9	-0.125554	-1.09093	0.509596	0.93629	1
Fusobacteriota	0.117647	1.26408	2.40174	0.772839	0.899695	1	0	0.470151	1.38525	0.914534	0.914556	1	0.117647	0.793926	1.73379	0.381538	0.93629	1
Patescibacteria	68.5294	3.73433	13.309	4.66161e-06	3.96237e-05	7.92474e-05	80	3.81054	14.031	1.75785e-06	1.49418e-05	2.98835e-05	80	-0.0762198	-1.05425	0.852926	0.93629	1
Proteobacteria	2.11765	4.67973	25.6295	0.287519	0.6649	1	1.125	3.13767	8.80104	0.475045	0.914556	1	2.11765	1.54206	2.9121	0.0556124	0.315137	0.945411
Verrucomicrobiota	4677.53	15.6274	50618.7	0.000372062	0.00186472	0.00632505	1.70833	3.51584	11.4386	0.422916	0.914556	1	4677.53	12.1115	4425.23	1.13371e-59	1.9273e-58	1.9273e-58
Microsporidia	0	0.555823	1.47001	0.899695	0.899695	1	0	0.470151	1.38525	0.914556	0.914556	1	0	0.0856718	1.06118	0.934667	0.93629	1
N/A	1.94118	4.46717	22.1183	0.312894	0.6649	1	8.625	5.51939	45.8673	0.2105	0.7157	1	8.625	-1.05222	-2.07372	0.246258	0.837278	1
Article title: Immunization with a peptide fragment of resistin-like molecule beta results in attenuation of colitis associated with altered microflora in IL-10-/- mice
Journal name: Digestive Diseases and Sciences
Author names: Sean L. Barnes, Alda Vidrich, Manjit Maskey, Jing He, Kamil Khanipov, Steven M. Cohn
Corresponding author: Steven M. Cohn, Department of Internal Medicine, University of Texas Medical Branch, smcohn@utmb.edu
