# Supplementary material
Source: Research Square preprint supplement (doi:10.21203/rs.3.rs-9408007/v1)
Supplement: Supplementary file 6 [file d06234d9e03f02a324e69536.xlsx]

## Sheet: OTU Table (Family Filtered)
Table S5. OTU differential abundance analysis - PXM-treated mice (filtered by family).
Name	PXM vs. Control - Max group mean	PXM vs. Control - Log₂ fold change	PXM vs. Control - Fold change	PXM vs. Control - P value	PXM vs. Control - FDR P value	PXM vs. Control - Bonferroni P value	Immunized + PXM vs. Control - Max group mean	Immunized + PXM vs. Control - Log₂ fold change	Immunized + PXM vs. Control - Fold change	Immunized + PXM vs. Control - P value	Immunized + PXM vs. Control - FDR P value	Immunized + PXM vs. Control - Bonferroni P value	PXM vs. Immunized + PXM - Max group mean	PXM vs. Immunized + PXM - Log₂ fold change	PXM vs. Immunized + PXM - Fold change	PXM vs. Immunized + PXM - P value	PXM vs. Immunized + PXM - FDR P value	PXM vs. Immunized + PXM - Bonferroni P value
{Unknown}	0.0588235	0.333336	1.25992	0.939928	0.993124	1	0.0833333	0.182799	1.13508	0.966826	0.999338	1	0.0833333	0.150538	1.10998	0.886049	0.93188	1
{Unknown Phylum} Archaea	0	-0.0857426	-1.06123	0.984588	0.993124	1	0.0416667	-0.0297672	-1.02085	0.9946	0.999338	1	0.0416667	-0.0559754	-1.03956	0.960636	0.960636	1
{Unknown Phylum} Bacteria	0.235294	1.08794	2.1257	0.804614	0.993124	1	0	-0.283294	-1.21697	0.948735	0.999338	1	0.235294	1.37123	2.58691	0.168855	0.647617	1
Pyrinomonadaceae	0	-0.0766975	-1.0546	0.986252	0.993124	1	0	-0.278396	-1.21285	0.949734	0.999338	1	0	0.201698	1.15005	0.867761	0.93188	1
Bifidobacteriaceae	1018.94	1.61635	3.06599	0.00489556	0.0229715	0.298629	1298.08	0.8418	1.79229	0.107394	0.32755	1	1298.08	0.774554	1.71066	0.178565	0.647617	1
Corynebacteriaceae	0	-0.101414	-1.07282	0.981692	0.993124	1	0.25	0.798467	1.73925	0.854846	0.999338	1	0.25	-0.899881	-1.86591	0.357632	0.887234	1
Nocardiaceae	0	-0.109675	-1.07899	0.980161	0.993124	1	0.166667	0.54639	1.46043	0.900303	0.999338	1	0.166667	-0.656065	-1.57578	0.492139	0.93188	1
Eggerthellaceae	241	0.353667	1.2778	0.232745	0.525174	1	290.625	0.211719	1.15807	0.44315	0.844755	1	290.625	0.141948	1.10339	0.583779	0.93188	1
Bacteroidaceae	2408.47	4.5469	23.3751	3.23974e-10	3.95248e-09	1.97624e-08	1717.33	3.05271	8.29767	3.80389e-06	2.90046e-05	0.000232037	2408.47	1.49419	2.81707	0.0361647	0.275756	1
Muribaculaceae	6708	2.98694	7.92789	9.48008e-28	5.78285e-26	5.78285e-26	10039.5	3.13918	8.81025	4.67397e-36	2.85112e-34	2.85112e-34	10039.5	-0.152246	-1.1113	0.568117	0.93188	1
Porphyromonadaceae	0	-0.1107	-1.07975	0.979965	0.993124	1	0.0833333	0.1878	1.13903	0.965698	0.999338	1	0.0833333	-0.2985	-1.22986	0.760491	0.93188	1
Prevotellaceae	1484.18	1.10421	2.14981	0.000587292	0.0032568	0.0358248	1113.58	0.431213	1.34837	0.142537	0.370782	1	1484.18	0.672997	1.59438	0.0315021	0.274518	1
Rikenellaceae	2518.71	2.70657	6.52766	9.63358e-17	1.46912e-15	5.87648e-15	2467.5	2.50342	5.67028	6.91436e-17	1.40592e-15	4.21776e-15	2518.71	0.203145	1.1512	0.50912	0.93188	1
Saprospiraceae	0	-0.0873553	-1.06242	0.98429	0.993124	1	0	-0.284284	-1.21781	0.948532	0.999338	1	0	0.196929	1.14626	0.864603	0.93188	1
Anaerolineaceae	0	-0.0845993	-1.06039	0.984798	0.993124	1	0	-0.282682	-1.21645	0.948855	0.999338	1	0	0.198083	1.14717	0.865414	0.93188	1
A4b	0	-0.100431	-1.07209	0.981876	0.993124	1	0	-0.292639	-1.22488	0.946868	0.999338	1	0	0.192208	1.14251	0.860306	0.93188	1
{Unknown Family} FS117-23B-02	0	-0.0879496	-1.06286	0.984181	0.993124	1	0	-0.284637	-1.2181	0.948461	0.999338	1	0	0.196687	1.14606	0.864417	0.93188	1
{Unknown Family} Chloroplast	0.117647	0.623337	1.54043	0.887676	0.993124	1	0.125	0.453719	1.36957	0.917673	0.999338	1	0.125	0.169619	1.12476	0.862765	0.93188	1
Trueperaceae	0.0588235	0.327688	1.255	0.940879	0.993124	1	0	-0.284167	-1.21771	0.948556	0.999338	1	0.0588235	0.611855	1.52822	0.572314	0.93188	1
Desulfovibrionaceae	41.2941	7.35863	164.123	0.0974774	0.283148	1	8.20833	4.69159	25.841	0.288832	0.607544	1	41.2941	2.66704	6.35125	0.00673587	0.102722	0.410888
{Unknown Order} Bacilli	60.8235	8.1626	286.542	0.0663913	0.202493	1	47.6667	7.44046	173.7	0.0928178	0.297994	1	60.8235	0.722149	1.64964	0.472839	0.93188	1
Acholeplasmataceae	215	2.65909	6.31636	0.000119941	0.00073164	0.0073164	271.083	2.62373	6.16343	4.93225e-05	0.000334297	0.00300867	271.083	0.0353607	1.02481	0.952379	0.960636	1
Bacillaceae	0	-0.0917228	-1.06564	0.983483	0.993124	1	0.0416667	0.00364019	1.00253	0.999338	0.999338	1	0.0416667	-0.095363	-1.06833	0.930742	0.960636	1
Erysipelatoclostridiaceae	30.2941	9.07171	538.094	0.0407262	0.134522	1	55.1667	8.2387	302.062	0.0620902	0.222794	1	55.1667	0.833014	1.7814	0.378165	0.887234	1
Erysipelotrichaceae	3094.59	7.47144	177.471	1.29718e-21	3.95639e-20	7.91278e-20	1907.17	6.36532	82.443	5.06369e-18	1.54443e-16	3.08885e-16	3094.59	1.10611	2.15265	0.0858868	0.436591	1
{Unknown Family} Lactobacillales	0	-0.0422679	-1.02973	0.992536	0.993124	1	22.5833	6.33779	80.8843	0.15196	0.370782	1	22.5833	-6.38006	-83.2891	7.16861e-07	1.45762e-05	4.37285e-05
Enterococcaceae	0	-0.0390067	-1.02741	0.993124	0.993124	1	33.0417	6.87107	117.057	0.120922	0.351251	1	33.0417	-6.91008	-120.265	1.48209e-07	4.52037e-06	9.04074e-06
Lactobacillaceae	3518.82	0.75749	1.69055	0.173422	0.42315	1	4260.75	0.00193839	1.00134	0.996939	0.999338	1	4260.75	0.755551	1.68828	0.180483	0.647617	1
Listeriaceae	0	-0.0875052	-1.06253	0.984262	0.993124	1	0	-0.284373	-1.21788	0.948513	0.999338	1	0	0.196868	1.14621	0.864543	0.93188	1
Streptococcaceae	4.82353	4.74787	26.8689	0.274567	0.577537	1	7.125	4.88505	29.5492	0.260581	0.58872	1	7.125	-0.13718	-1.09975	0.696599	0.93188	1
{Unknown Family} RF39	25.3529	6.85163	115.491	0.115259	0.319583	1	24.75	6.47438	88.9167	0.136391	0.370782	1	25.3529	0.377251	1.29886	0.343288	0.887234	1
Staphylococcaceae	9.41176	5.64237	49.9484	0.201145	0.471917	1	2.95833	3.37898	10.4033	0.44279	0.844755	1	9.41176	2.26339	4.80118	0.00908034	0.11078	0.553901
{Unknown Order} Clostridia	213.824	9.97655	1007.49	0.021686	0.0881896	1	358.083	10.4304	1379.97	0.0163271	0.0829963	0.995955	358.083	-0.45387	-1.36971	0.176831	0.647617	1
Christensenellaceae	13.0588	6.08012	67.6549	0.161429	0.410299	1	18.3333	6.30196	78.9002	0.146479	0.370782	1	18.3333	-0.221835	-1.16622	0.451926	0.93188	1
{Unknown Family} Clostridia UCG-014	295.471	2.7417	6.68857	1.37639e-08	1.19942e-07	8.39596e-07	479.792	3.0702	8.39888	2.10512e-11	2.14021e-10	1.28413e-09	479.792	-0.328499	-1.25571	0.370543	0.887234	1
{Unknown Family} Clostridia vadinBB60 group	314.882	2.92956	7.61876	8.23328e-10	8.3705e-09	5.0223e-08	490.208	3.12785	8.74133	5.58399e-12	6.81247e-11	3.40624e-10	490.208	-0.198297	-1.14734	0.574713	0.93188	1
Clostridiaceae	824.588	-1.15671	-2.22949	0.241064	0.525174	1	1694.88	-0.911792	-1.88138	0.308674	0.627636	1	1694.88	-0.244921	-1.18503	0.80681	0.93188	1
Lachnospiraceae	8364.94	-2.51468	-5.71469	4.39245e-17	8.93132e-16	2.6794e-15	13012.2	-2.2449	-4.74005	1.40917e-16	2.14899e-15	8.59596e-15	13012.2	-0.269774	-1.20562	0.374849	0.887234	1
Monoglobaceae	10.3529	1.64508	3.12765	0.127902	0.339217	1	27.7083	2.49435	5.63475	0.0192283	0.0902249	1	27.7083	-0.849274	-1.80159	0.0283014	0.274518	1
[Eubacterium] coprostanoligenes group	245.118	-1.0212	-2.02961	0.0368575	0.132253	1	253.542	-1.49082	-2.81048	0.000828305	0.00459333	0.0505266	253.542	0.469614	1.38474	0.334514	0.887234	1
Butyricicoccaceae	128.765	1.96333	3.89962	9.63654e-05	0.000653143	0.00587829	246.5	2.52814	5.76828	1.37394e-07	1.19729e-06	8.38101e-06	246.5	-0.564809	-1.47919	0.120922	0.567403	1
Hungateiclostridiaceae	0	-0.1107	-1.07975	0.979965	0.993124	1	0	-0.300074	-1.23121	0.945389	0.999338	1	0	0.189374	1.14027	0.85534	0.93188	1
Oscillospiraceae	1529.12	0.702282	1.62708	0.019012	0.082838	1	1840.33	0.626678	1.54401	0.0219977	0.0958473	1	1840.33	0.075604	1.0538	0.797157	0.93188	1
Ruminococcaceae	505.706	0.0478878	1.03375	0.888508	0.993124	1	666.542	0.10062	1.07223	0.747812	0.999338	1	666.542	-0.0527323	-1.03723	0.87319	0.93188	1
UCG-010	14.8824	0.587841	1.503	0.435509	0.830189	1	28.3333	1.30305	2.4675	0.0756445	0.256351	1	28.3333	-0.715208	-1.64172	0.0605829	0.410617	1
Peptococcaceae	18.7059	2.30941	4.95679	0.0239937	0.091476	1	19	2.04568	4.12868	0.044115	0.179401	1	19	0.263727	1.20058	0.337987	0.887234	1
Anaerovoracaceae	86.1176	8.85215	462.127	0.0419001	0.134522	1	66.7917	8.13368	280.855	0.0613797	0.222794	1	86.1176	0.718464	1.64543	0.0744669	0.436591	1
Peptostreptococcaceae	512.529	0.443413	1.35982	0.542938	0.993124	1	884.375	0.83226	1.78047	0.20973	0.492058	1	884.375	-0.388848	-1.30935	0.593901	0.93188	1
Fusobacteriaceae	0.117647	0.597527	1.51312	0.891465	0.993124	1	0	-0.300074	-1.23121	0.945389	0.999338	1	0.117647	0.897601	1.86297	0.322498	0.887234	1
{Unknown Family} Candidatus Pacebacteria	0	-0.0909103	-1.06504	0.983634	0.993124	1	0	-0.286433	-1.21962	0.9481	0.999338	1	0	0.195522	1.14514	0.863458	0.93188	1
{Unknown Family} Candidatus Woesebacteria	0	-0.1107	-1.07975	0.979965	0.993124	1	0	-0.300074	-1.23121	0.945389	0.999338	1	0	0.189374	1.14027	0.85534	0.93188	1
Saccharimonadaceae	68.5294	3.08293	8.47332	6.70068e-05	0.000510927	0.00408742	80	3.0323	8.18115	6.97785e-05	0.000425649	0.00425649	80	0.0506247	1.03571	0.86853	0.93188	1
Sphingomonadaceae	0	-0.07408	-1.05269	0.986733	0.993124	1	0	-0.277077	-1.21174	0.950008	0.999338	1	0	0.202997	1.15109	0.868493	0.93188	1
{Unknown Order} Gammaproteobacteria	0	-0.1107	-1.07975	0.979965	0.993124	1	0	-0.300074	-1.23121	0.945389	0.999338	1	0	0.189374	1.14027	0.85534	0.93188	1
Enterobacteriaceae	0	-0.0887454	-1.06345	0.984033	0.993124	1	0.125	0.344836	1.27001	0.937329	0.999338	1	0.125	-0.433581	-1.35058	0.688461	0.93188	1
Moraxellaceae	0	-0.1107	-1.07975	0.979965	0.993124	1	0	-0.300074	-1.23121	0.945389	0.999338	1	0	0.189374	1.14027	0.85534	0.93188	1
Pseudomonadaceae	2.11765	3.72587	13.2312	0.397639	0.798243	1	0.833333	2.27239	4.83123	0.605194	0.999338	1	2.11765	1.45348	2.73868	0.0848002	0.436591	1
Xanthomonadaceae	0	-0.1107	-1.07975	0.979965	0.993124	1	0.166667	0.551657	1.46577	0.899302	0.999338	1	0.166667	-0.662357	-1.58267	0.483185	0.93188	1
Akkermansiaceae	4677.53	14.8239	29003.1	0.000750686	0.00381599	0.0457918	1.70833	2.72968	6.63311	0.5344	0.98783	1	4677.53	12.0942	4372.48	4.11699e-52	2.51136e-50	2.51136e-50
Amblyosporidae	0	-0.1107	-1.07975	0.979965	0.993124	1	0	-0.300074	-1.23121	0.945389	0.999338	1	0	0.189374	1.14027	0.85534	0.93188	1
N/A	1.94118	3.68106	12.8265	0.405664	0.798243	1	8.625	4.79051	27.6749	0.276973	0.603406	1	8.625	-1.10945	-2.15763	0.227229	0.770053	1
Article title: Immunization with a peptide fragment of resistin-like molecule beta results in attenuation of colitis associated with altered microflora in IL-10-/- mice
Journal name: Digestive Diseases and Sciences
Author names: Sean L. Barnes, Alda Vidrich, Manjit Maskey, Jing He, Kamil Khanipov, Steven M. Cohn
Corresponding author: Steven M. Cohn, Department of Internal Medicine, University of Texas Medical Branch, smcohn@utmb.edu
